# Supplementary material for: Length evolution of helical micro/nano-scale structures
Source: Royal Society of Chemistry journal article supplement (doi:10.1039/c4ra03452j), 2014-01-01
Supplement: c4ra03452j1.pdf [file c4ra03452j1.pdf]

Supporting Information

# Length evolution of helical micro/nano-scale structures

Yuanqiang Song<sup>1†</sup>, Xian Jian<sup>1†</sup>, Yu Pan<sup>1†</sup>, Bo Wang<sup>2</sup>, Weirong Huo<sup>1</sup>, Aifang Liu<sup>1</sup>,

Weiqiang Lv<sup>1</sup> & Weidong He<sup>1,3,4\*</sup>

<sup>1</sup>School of Energy Science and Engineering, University of Electronic Science and Technology of China (UESTC), Chengdu, 611731, PR China, <sup>2</sup>School of Mathematics, University of Electronic Science and Technology of China (UESTC), Chengdu, 611731, PR China, <sup>3</sup>Interdisciplinary Program in Materials Science, Vanderbilt University, Nashville, Tennessee 37234-0106, USA, <sup>4</sup>Vanderbilt Institute of Nanoscale Science and Engineering, Vanderbilt University, Nashville, Tennessee 37234-0106, USA. \*Correspondence and requests for materials should be addressed to W. H. (email: weidong.he@uestc.edu.cn and weidong.he@vanderbilt.edu). †These authors contributed equally to this work.

## *The dependence of $L$ on $h$ in both CLHL and COHL cases.*

Both  $L_{\text{CLHL}}$  and  $L_{\text{COHL}}$  increase linearly with increasing  $h$ , as shown in Figures S1 and S2. The plots show a non-linear dependence of  $L$  on  $d$ . Just as mentioned in the manuscript, there exists a critical point for  $d$ , below which the increasing slope of  $L$  with increasing  $h$  is much slower; above the critical point of  $d$ , the increase becomes much steeper with the increase of  $h$ .

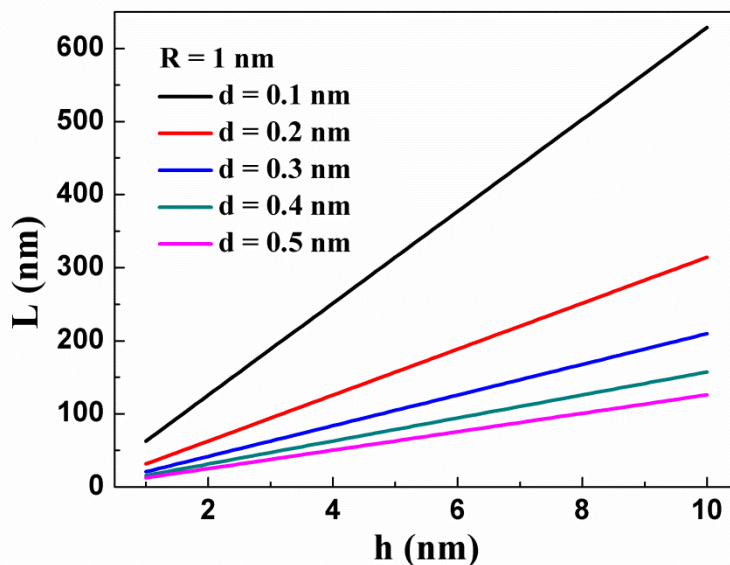

Figure S1 | Plots of  $L_{\text{CLHL}}$  vs.  $h$  with fixed  $R$  and  $d$ .

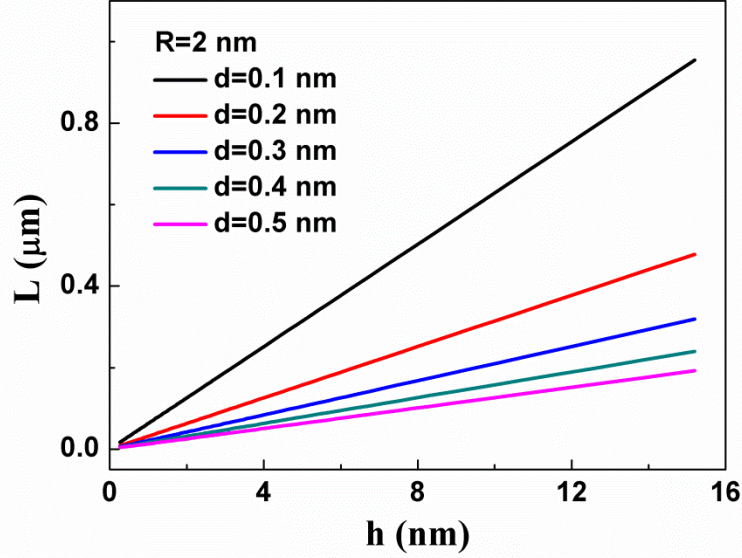

**Figure S2** | Plots of  $L_{\text{COHL}}$  vs.  $h$  with fixed  $R$  and  $d$ .

### ***Derivation of the helical length formula of a COHL structure***

The equation of the COHL can be parameterized using the rotation angle  $\theta$  in a cylindrical coordinate. Therefore, the parametric equation of the COHL can be described in Eq. 1,

$$\begin{cases} x(\theta) = R(\theta) \cos(\theta) \\ y(\theta) = R(\theta) \sin(\theta), \quad 0 \leq \theta \leq 2k\pi \\ z(\theta) = v\theta \end{cases} \quad (1)$$

where  $v = \frac{d}{2\pi}$  and  $R(\theta) = R - v\theta \cot \alpha$ .

The helical length of the COHL ( $L_{\text{COHL}}$ ) can be obtained through the curve integral as exhibited in Eq. 2.

$$L_{\text{COHL}} = \int_0^{2k\pi} \left\{ [x'(\theta)]^2 + [y'(\theta)]^2 + [z'(\theta)]^2 \right\}^{1/2} d\theta \quad (2)$$

Substituting Eq.1 into Eq. 2, we then obtain Eq. 3,

$$L_{\text{COHL}} = v \int_0^{2k\pi} \left[ \theta^2 \cot^2 \alpha - \theta \cot \alpha \frac{2R}{v} + c \right]^{1/2} d\theta$$

(3)

where  $k = \frac{h}{d}$  and  $c = 1 + \cot^2 \alpha + (R/v)^2$ .

To simplify the derivation, we denote the coefficient  $\cot^2 \alpha$  as  $a$ ,  $(2R/v)\cot \alpha$  as  $b$  and the integrand  $(a\theta^2 + b\theta + c)^{1/2}$  as  $F$ . Therefore, Eq. 3 can be solved through the following integrals in Eqs. 4 and 5 by assuming  $a > 0$  and  $4ac - b^2 > 0$ .

$$\int F d\theta = \frac{2a\theta - 3b}{4a^2} F + \frac{3b^2 - 4ac}{8a^2} \int \frac{d\theta}{F} \quad (4)$$

$$\int \frac{d\theta}{F} = \frac{1}{\sqrt{a}} \operatorname{arsinh} \frac{2a\theta + b}{\sqrt{4ac - b^2}} \quad (5)$$

Substituting Eq. 4 into Eq. 5, we get Eq. 6.

$$\int F d\theta = \frac{2a\theta - 3b}{4a^2} F + \frac{3b^2 - 4ac}{8a^{2.5}} \operatorname{arsinh} \frac{2a\theta + b}{\sqrt{4ac - b^2}} \quad (6)$$

By replacing  $a$ ,  $b$ ,  $c$  and  $F$  in Eq. 6 with the original form, we finally obtain the helical length  $L_{\text{COHL}}$  as shown in Eq. 7.

$$L_{\text{COHL}} = \left[ \frac{v\theta \cot \alpha - R}{2\cot \alpha} \sqrt{(\theta \cot \alpha - \frac{R}{v})^2 + 1 + \cot^2 \alpha} + \frac{v(1 + \cot^2 \alpha)}{2\cot \alpha} \operatorname{arsinh} \left( \frac{v\theta \cot \alpha - R}{v\sqrt{1 + \cot^2 \alpha}} \right) \right] \Bigg|_0^{2k} \quad (7)$$

Simplifying the result by replacing  $R - v\theta \cot \alpha$  with  $R(\theta)$ , we get Eq. 8.

$$L_{\text{COHL}} = \left[ \frac{-R(\theta)}{2\cot \alpha} \sqrt{\frac{R^2(\theta)}{v^2} + 1 + \cot^2 \alpha} + \frac{v(1 + \cot^2 \alpha)}{2\cot \alpha} \operatorname{arsinh} \left( \frac{-R(\theta)}{v\sqrt{1 + \cot^2 \alpha}} \right) \right] \Bigg|_0^{2k\pi} \quad (8)$$

By replacing  $v$  with  $v = d/2\pi$ , and  $R(\theta)$  with  $R - v\theta \cot \alpha$ , we get the final form of the helical length  $L_{\text{COHL}}$ , written as Eq. 9, where  $k = \frac{h}{d}$ .

$$L_{\text{COHL}} = \left[ \frac{\theta d \cot \alpha - R}{4\pi \cot \alpha} \sqrt{\frac{(4\pi^2 R - d v \theta \cot \alpha)^2}{d^2} + 1 + \cot^2 \alpha} + \frac{d(1 + \cot^2 \alpha)}{4\pi \cot \alpha} \operatorname{arsinh} \left( \frac{d(\theta d \cot \alpha - R)}{4\pi^2 \sqrt{1 + \cot^2 \alpha}} \right) \right] \quad (9)$$
